# Supplementary material
Source: PubMed Central journal article supplement (PMC2802483)

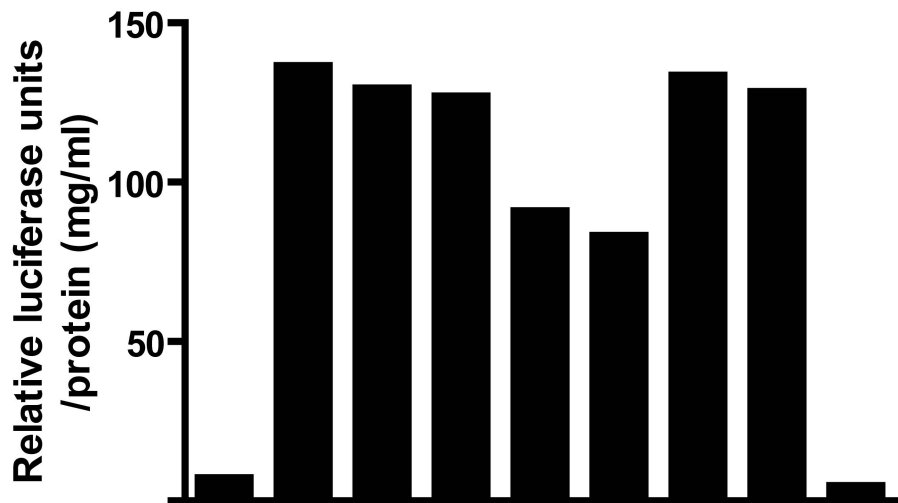

Ctrl (DMSO)

+

10 nM TCDD

+

+

+

+

+

+

+

+

+

} 4 h treatment of cells

Ctrl (DMSO)

+

4'-methoxyflavone

+

5-methoxyflavone

+

7, 4'-dimethoxyisoflavone

+

6, 2', 4'-trimethoxyflavone

+

$\alpha$ -naphthoflavone

+

$\beta$ -naphthoflavone

+

} 10 min incubation with cell lysate at 10  $\mu$ M

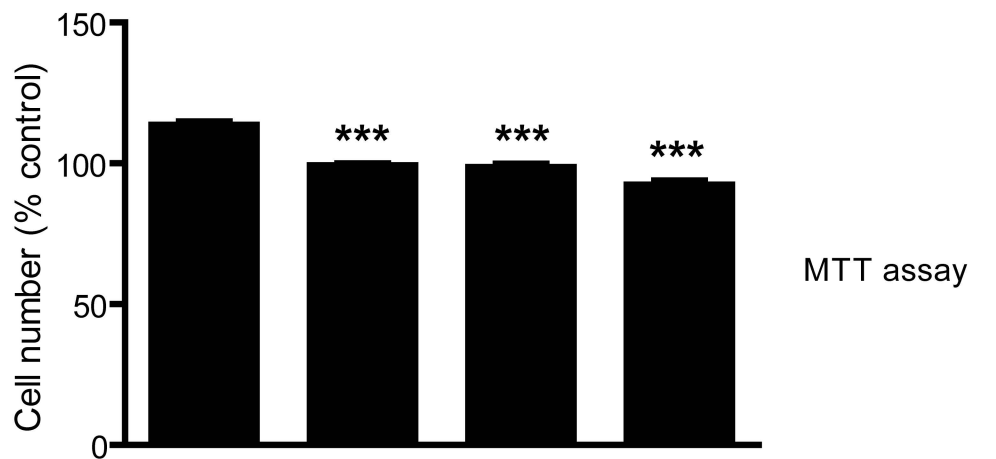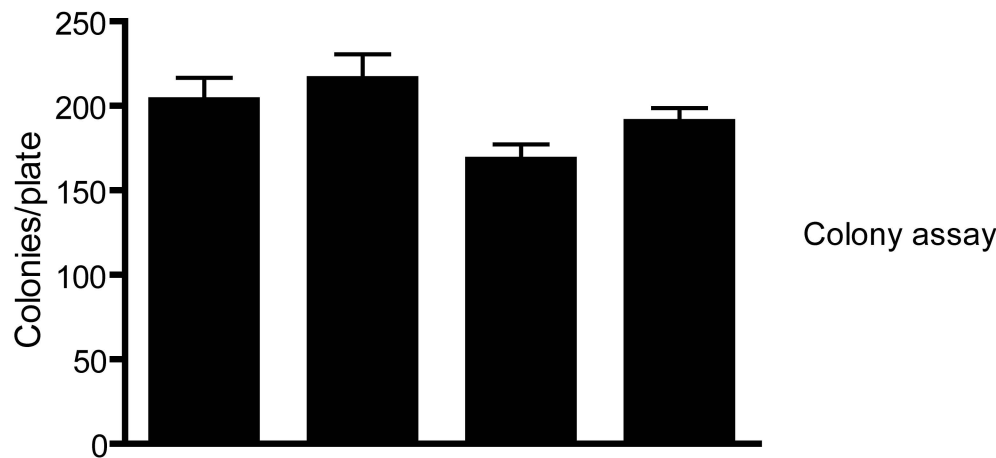

|                         |   |   |   |   |
|-------------------------|---|---|---|---|
| Ctrl (DMSO)             | + |   |   |   |
| 10 $\mu$ M $\alpha$ -NF |   | + |   |   |
| 10 $\mu$ M $\beta$ -NF  |   |   | + |   |
| 10 $\mu$ M TMF          |   |   |   | + |

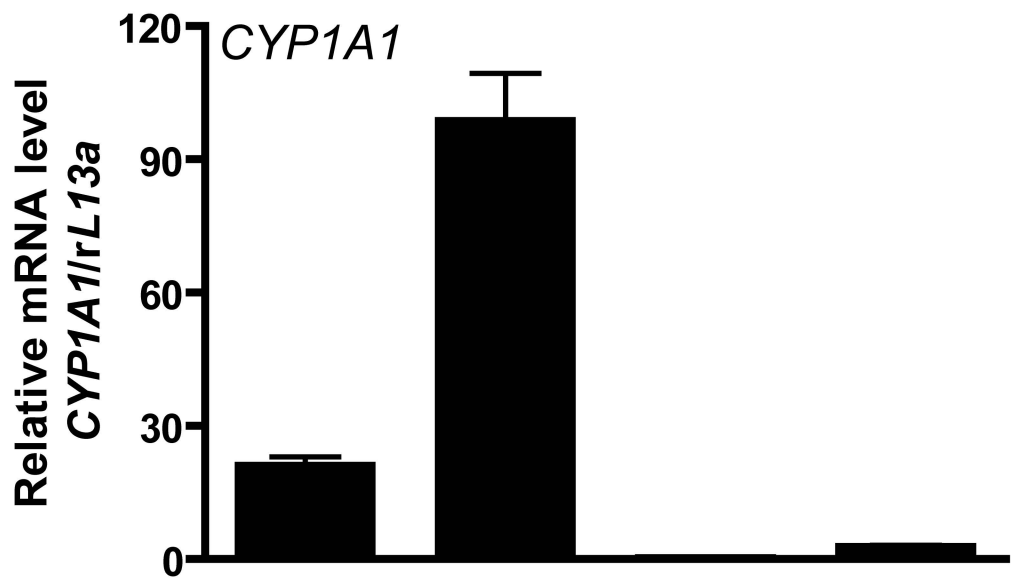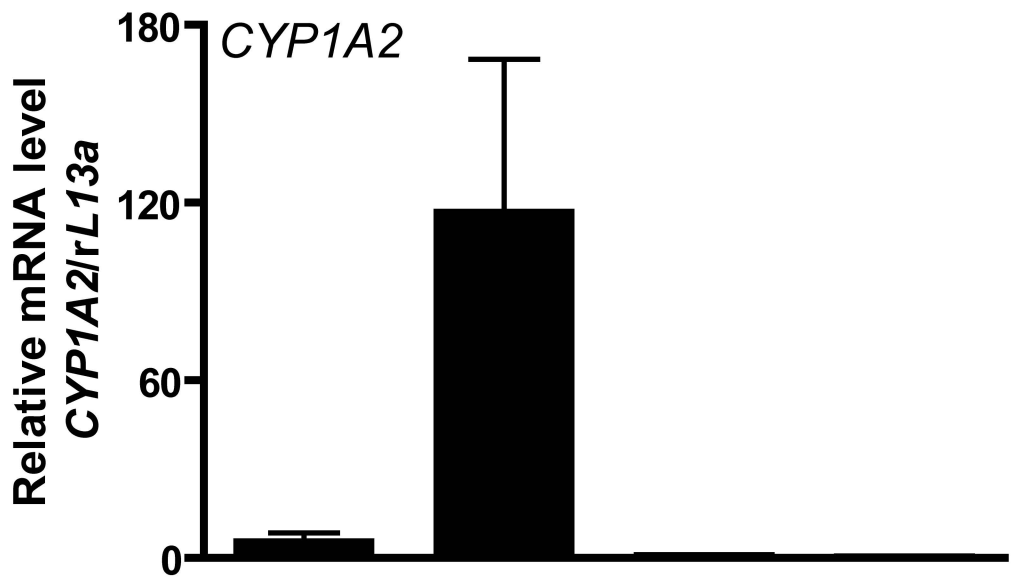

Ctrl (DMSO)

+

10 nM TCDD

+

+

10 μM TMF

+

+

Supplemental Figure 4

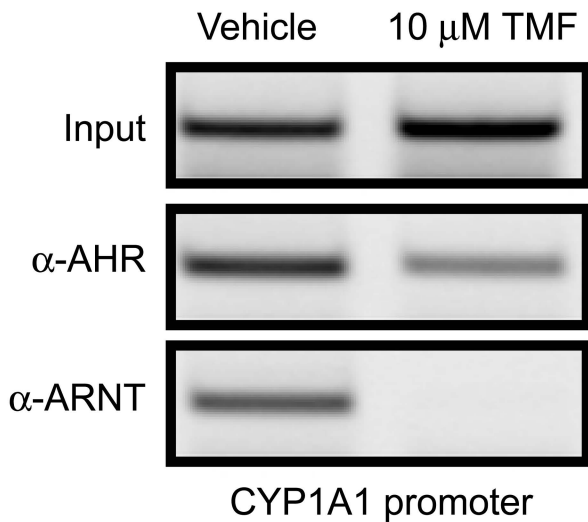

Supplement: supp_109.158261_JPET158261_Supplemental_images.pdf [file supp_109.158261_JPET158261_Supplemental_images.pdf]
